# Supplementary material
Source: PubMed Central journal article supplement (PMC4793339)
Supplement: nach013406.ww1_default.pdf [file nach013406.ww1_default.pdf]

## Comparative Effectiveness of Exercise and Drug Interventions on Mortality Outcomes: A meta-epidemiological study

### Supplementary Table

#### Coronary Heart Disease

| Intervention  | Publication                                                                                                                                                                                                                      | Pairwise meta-analysis                                                                                         | Trial and patient population characteristics                                                                                                                                                                                                                                                                                                                                                                                                                                                                                                                                                       |
|---------------|----------------------------------------------------------------------------------------------------------------------------------------------------------------------------------------------------------------------------------|----------------------------------------------------------------------------------------------------------------|----------------------------------------------------------------------------------------------------------------------------------------------------------------------------------------------------------------------------------------------------------------------------------------------------------------------------------------------------------------------------------------------------------------------------------------------------------------------------------------------------------------------------------------------------------------------------------------------------|
| Exercise      | Heran BS, Chen JM, Ebrahim S, Moxham T, Oldridge N, Rees K, Thompson DR, Taylor RS. Exercise-based cardiac rehabilitation for coronary heart disease. Cochrane Database of Systematic Reviews 2011, Issue 7. Art. No.: CD001800. | Number of included trials: 34<br>Pairwise effect estimate (95% CI): 0.89 (0.78, 1.02)<br>I <sup>2</sup> : 0.0% | <i>Eligibility criteria:</i> Randomized controlled trials of men and women of all ages who have had coronary heart disease.<br><i>Included patients:</i> Patients who have had a myocardial infarction, or who had undergone revascularization, or who have angina pectoris or coronary artery disease defined by angiography. 64% of trials included only patients with myocardial infarction.<br><i>Age distribution:</i> Range from 46 to 84 years.<br><i>Trial follow-up duration:</i> 24 months (median).<br><i>Blinding:</i> Trial participants not blinded; 3 trials had blinded assessors. |
| Statins       | Naci H, Brugts JJ, Fleurence R, Tsoi B, Toor H, Ades AE. Comparative benefits of statins for the primary and secondary prevention of all-cause mortality and major coronary events. Eur J Prev Cardiol. 2013 Aug;20(4):641-57.   | Number of included trials: 43<br>Pairwise effect estimate (95% CI): 0.82 (0.77, 0.88)<br>I <sup>2</sup> : 0.0% | <i>Eligibility criteria:</i> Placebo-controlled or active-comparator randomized controlled trials of atorvastatin, fluvastatin, lovastatin, pravastatin, rosuvastatin, and simvastatin in adults with coronary heart disease.<br><i>Included patients:</i> Patients with established coronary heart disease, as defined by trial investigators.<br><i>Age distribution:</i> Range from 47 to 76 years.<br><i>Trial follow-up duration:</i> 116 weeks (mean).<br><i>Blinding:</i> 19 trials had double blinding.                                                                                    |
| Beta-blockers | Freemantle N, Cleland J, Young P, Mason J, Harrison J. $\beta$ Blockade after myocardial infarction: systematic review and meta regression analysis. BMJ 1999;318:1730                                                           | Number of included trials: 80<br>Pairwise effect estimate (95% CI): 0.87 (0.83, 0.93)<br>I <sup>2</sup> : 0.0% | <i>Eligibility criteria:</i> Randomized controlled trials of beta-blockers in patients with acute or past myocardial infarction.<br><i>Included patients:</i> patients who had myocardial infarction.<br><i>Age distribution:</i> Not reported.<br><i>Trial follow-up duration:</i> 51 trials in acute treatment with follow-up of 6 weeks; and 31 trials with long-term treatment ranging with follow-up ranging from 6 to 48 months.                                                                                                                                                             |

|                |                                                                                                                                                                                                                                                                                           |                                                                                                                 |                                                                                                                                                                                                                                                                                                                                                                                                                                                                                                                          |
|----------------|-------------------------------------------------------------------------------------------------------------------------------------------------------------------------------------------------------------------------------------------------------------------------------------------|-----------------------------------------------------------------------------------------------------------------|--------------------------------------------------------------------------------------------------------------------------------------------------------------------------------------------------------------------------------------------------------------------------------------------------------------------------------------------------------------------------------------------------------------------------------------------------------------------------------------------------------------------------|
|                |                                                                                                                                                                                                                                                                                           |                                                                                                                 | <i>Blinding:</i> 46 trials had double-blinding.                                                                                                                                                                                                                                                                                                                                                                                                                                                                          |
| ACE-inhibitors | Domanski MJ, Exner DV, Borkowf CB, Geller NL, Rosenberg Y, Pfeffer MA. Effect of angiotensin converting enzyme inhibition on sudden cardiac death in patients following acute myocardial infarction. A meta-analysis of randomized clinical trials. J Am Coll Cardiol. 1999;33(3):598-604 | Number of included trials: 15<br>Pairwise effect estimate (95%CI): 0.83 (0.71, 0.97)<br>I <sup>2</sup> : 39.5%  | <i>Eligibility criteria:</i> Randomized controlled trials of ACE inhibitor therapy following MI.<br><i>Included patients:</i> men and women of all ages in patients with a history of myocardial infarction within the prior 14 days.<br><i>Age distribution:</i> Range from 54 to 67 years.<br><i>Trial follow-up duration:</i> Ranged from 2 months to 42 months, with the majority of trials following patients up for a period between 3 and 12 months.<br><i>Blinding:</i> All included trials were double-blinded. |
| Antiplatelets  | Antithrombotic Trialists' Collaboration. Collaborative meta-analysis of randomised trials of antiplatelet therapy for prevention of death, myocardial infarction, and stroke in high risk patients. BMJ 2002;324:71                                                                       | Number of included trials: 27<br>Pairwise effect estimate (95% CI): 0.83 (0.75, 0.93)<br>I <sup>2</sup> : 22.5% | <i>Eligibility criteria:</i> Randomized controlled trials of an antiplatelet regimen versus control or of one antiplatelet regimen versus another in high-risk patients.<br><i>Included patients:</i> Patients with acute myocardial infarction or previous myocardial infarction.<br><i>Age distribution:</i> Not reported.<br><i>Trial follow-up duration:</i> Ranged from 7 days to 72 months (mean ~16 months).<br><i>Blinding:</i> Not specified; trials were "unconfounded" as described by investigators.         |

## Stroke

| Intervention   | Publication                                                                                                                                                                   | Pairwise meta-analysis                                                                                          | Trial and patient population characteristics                                                                                                                                                                                                                                                                                                                                                                                                                                                                                                                                                                                         |
|----------------|-------------------------------------------------------------------------------------------------------------------------------------------------------------------------------|-----------------------------------------------------------------------------------------------------------------|--------------------------------------------------------------------------------------------------------------------------------------------------------------------------------------------------------------------------------------------------------------------------------------------------------------------------------------------------------------------------------------------------------------------------------------------------------------------------------------------------------------------------------------------------------------------------------------------------------------------------------------|
| Exercise       | Brazzelli M, Saunders DH, Greig CA, Mead GE. Physical fitness training for stroke patients. Cochrane Database of Systematic Reviews 2011, Issue 11. Art. No.: CD003316.       | Number of included trials: 3<br>Pairwise effect estimate (95% CI): 0.27 (0.05, 1.39)<br>I <sup>2</sup> : 0.0%   | <i>Eligibility criteria:</i> Randomized trials comparing either cardiorespiratory training or resistance training, or both, with no intervention, a non-exercise intervention, or usual care in stroke survivors.<br><i>Included patients:</i> Adult stroke survivors who were considered suitable for exercise training. The majority of patients were ambulatory stroke survivors but one trial included non-ambulatory patients as well.<br><i>Age distribution:</i> 64 (mean).<br><i>Trial follow-up duration:</i> Range from 12 weeks to 12 months.<br><i>Blinding:</i> Assessors were blinded.                                 |
| Anticoagulants | Sandercock PA, Counsell C, Kamal AK. Anticoagulants for acute ischaemic stroke. Cochrane Database Syst Rev. 2008;(4):CD000024.                                                | Number of included trials: 10<br>Pairwise effect estimate (95% CI): 1.01 (0.85, 1.20)<br>I <sup>2</sup> : 22.8% | <i>Eligibility criteria:</i> Randomized trials comparing early anticoagulant therapy (started within two weeks of stroke onset) with control in patients with acute presumed or confirmed ischemic stroke.<br><i>Included patients:</i> Patients undergoing early treatment of acute ischemic stroke within 14 days after stroke.<br><i>Age distribution:</i> Range from 28 to 92 years with a significant share over 70 years.<br><i>Trial follow-up duration:</i> >1 month.<br><i>Blinding:</i> Predominantly double-blinded.                                                                                                      |
| Antiplatelets  | Sandercock PAG, Counsell C, Gubitz GJ, Tseng M-C. Antiplatelet therapy for acute ischaemic stroke. Cochrane Database of Systematic Reviews 2008, Issue 3. Art. No.: CD000029. | Number of included trials: 14<br>Pairwise effect estimate (95% CI): 0.92 (0.86, 0.99)<br>I <sup>2</sup> : 2.2%  | <i>Eligibility criteria:</i> Randomized trials comparing antiplatelet therapy (started within 14 days of the stroke) with control in patients with definite or presumed ischemic stroke.<br><i>Included patients:</i> Patients within two weeks of onset of presumed ischemic stroke.<br><i>Age distribution:</i> Majority of patients were elderly, with a significant proportion of participants over 70 years of age.<br><i>Trial follow-up duration:</i> Follow up ranged from 10 days to 6 months with the majority of trials reporting at 3 months.<br><i>Blinding:</i> Participants were blinded in all trials except for one |

|                                  |                                                                                                                                                                         |                                                                                                               |                                                                                                                                                                                                                                                                                                                                                                                                                                                                                                                                                                                                                                                                                                                                                            |
|----------------------------------|-------------------------------------------------------------------------------------------------------------------------------------------------------------------------|---------------------------------------------------------------------------------------------------------------|------------------------------------------------------------------------------------------------------------------------------------------------------------------------------------------------------------------------------------------------------------------------------------------------------------------------------------------------------------------------------------------------------------------------------------------------------------------------------------------------------------------------------------------------------------------------------------------------------------------------------------------------------------------------------------------------------------------------------------------------------------|
|                                  |                                                                                                                                                                         |                                                                                                               | (where only assessors were blinded).                                                                                                                                                                                                                                                                                                                                                                                                                                                                                                                                                                                                                                                                                                                       |
| Anticoagulants vs. antiplatelets | Berge E, Sandercock P. Anticoagulants versus antiplatelet agents for acute ischaemic stroke. Cochrane Database of Systematic Reviews 2002, Issue 4. Art. No.: CD003242. | Number of included trials: 3<br>Pairwise effect estimate (95% CI): 1.10 (1.01, 1.21)<br>I <sup>2</sup> : 0.0% | <p><i>Eligibility criteria:</i> Randomized controlled trials comparing anticoagulants with antiplatelet agents, or anticoagulants and antiplatelet agents with antiplatelet agents alone, given within 14 days of onset of presumed or confirmed ischemic stroke.</p> <p><i>Included patients:</i> Patients within 14 days of onset of acute ischemic stroke.</p> <p><i>Age distribution:</i> Range from 10 days to 6 months, with the majority of trials following patients up until 3 months.</p> <p><i>Trial follow-up duration:</i> Two trials had a follow-up duration of 6 months and one trial had a follow-up duration of 3 months.</p> <p><i>Blinding:</i> Two trials were double-blinded while only the assessors were blinded in one trial.</p> |

## Heart Failure

| Intervention   | Publication                                                                                                                                                                                                                                                                                                                                                              | Pairwise meta-analysis                                                                                          | Trial and patient population characteristics                                                                                                                                                                                                                                                                                                                                                                                                                                                                                                                                                                                                                               |
|----------------|--------------------------------------------------------------------------------------------------------------------------------------------------------------------------------------------------------------------------------------------------------------------------------------------------------------------------------------------------------------------------|-----------------------------------------------------------------------------------------------------------------|----------------------------------------------------------------------------------------------------------------------------------------------------------------------------------------------------------------------------------------------------------------------------------------------------------------------------------------------------------------------------------------------------------------------------------------------------------------------------------------------------------------------------------------------------------------------------------------------------------------------------------------------------------------------------|
| Exercise       | Davies EJ, Moxham T, Rees K, Singh S, Coats AJ, Ebrahim S, Lough F, Taylor RS. Exercise based rehabilitation for heart failure. Cochrane Database Syst Rev(4): 2011 CD003331.                                                                                                                                                                                            | Number of included trials: 16<br>Pairwise effect estimate (95% CI): 0.81 (0.64, 1.02)<br>I <sup>2</sup> : 6.4%  | <i>Eligibility criteria:</i> Randomized controlled trials of exercise-based interventions in adults of all ages with evidence of chronic systolic heart failure.<br><i>Included patients:</i> Patients with heart failure or left-ventricular dysfunction, with all of the included trials including patients with NYHA class II-III.<br><i>Age distribution:</i> Range from 43 to 72 years.<br><i>Trial follow-up duration:</i> While a number of trials had follow-up shorter than 12 months, over 70% of trial participants were included in trials with follow-up durations longer than 12 months.<br><i>Blinding:</i> Only two trials had blinded outcome assessment. |
| ACE-inhibitors | Flather MD, Yusuf S, Køber L, Pfeffer M, Hall A, Murray G, Torp-Pedersen C, Ball S, Pogue J, Moyé L, Braunwald E. Long-term ACE-inhibitor therapy in patients with heart failure or left-ventricular dysfunction: a systematic overview of data from individual patients. ACE-Inhibitor Myocardial Infarction Collaborative Group. Lancet. 2000 May 6;355(9215):1575-81. | Number of included trials: 5<br>Pairwise effect estimate (95% CI): 0.78 (0.71, 0.86)<br>I <sup>2</sup> : 0.0%.  | <i>Eligibility criteria:</i> Randomized controlled trials with individual-patient level data that assessed ACE inhibitors in patients with left-ventricular dysfunction or heart failure.<br><i>Included patients:</i> patients with heart failure or left-ventricular dysfunction, with 54% of patients had a history of myocardial infarctions.<br><i>Age distribution:</i> 61 years (mean).<br><i>Trial follow-up duration:</i> Mortality outcomes were available up to four years; data at one year were used to ensure consistency with other interventions.<br><i>Blinding:</i> All trials were double-blinded.                                                      |
| Beta-blockers  | Chatterjee S, Biondi-Zoccai G, Abbate A, D'Ascenzo F, Castagno D, Van Tassell B,                                                                                                                                                                                                                                                                                         | Number of included trials: 21<br>Pairwise effect estimate (95% CI): 0.71 (0.64, 0.80)<br>I <sup>2</sup> : 34.4% | <i>Eligibility criteria:</i> Randomized trials comparing $\beta$ blockers with control or other $\beta$ blockers in heart failure.<br><i>Included patients:</i> Patients with heart failure or left ventricular                                                                                                                                                                                                                                                                                                                                                                                                                                                            |

|           |                                                                                                                                                                                          |                                                                                                                                                                                                                                                                          |                                                                                                                                                                                                                                                                                                                                                                                                                                                                                                                                                                                                                                                                                                                                                                         |
|-----------|------------------------------------------------------------------------------------------------------------------------------------------------------------------------------------------|--------------------------------------------------------------------------------------------------------------------------------------------------------------------------------------------------------------------------------------------------------------------------|-------------------------------------------------------------------------------------------------------------------------------------------------------------------------------------------------------------------------------------------------------------------------------------------------------------------------------------------------------------------------------------------------------------------------------------------------------------------------------------------------------------------------------------------------------------------------------------------------------------------------------------------------------------------------------------------------------------------------------------------------------------------------|
|           | Mukherjee D, Lichstein E. Benefits of $\beta$ blockers in patients with heart failure and reduced ejection fraction: network meta-analysis. <i>BMJ</i> 2013;346:f55                      |                                                                                                                                                                                                                                                                          | ejection dysfunction, with 57% of patients with ischemic heart failure with the rest with left ventricular rejection dysfunction.<br><i>Age distribution:</i> 61 years (median).<br><i>Trial follow-up duration:</i> 12 months (median).<br><i>Blinding:</i> All trials had double blinding.                                                                                                                                                                                                                                                                                                                                                                                                                                                                            |
| Diuretics | Faris RF, Flather M, Purcell H, Poole-Wilson PA, Coats AJ. Diuretics for heart failure. <i>Cochrane Database of Systematic Reviews</i> 2012, Issue 2. Art. No.: CD003838.                | Number of included trials: 3<br>Pairwise effect estimate (95% CI): 0.24 (0.07, 0.84)<br>$I^2$ : 0.0%                                                                                                                                                                     | <i>Eligibility criteria:</i> Double-blinded randomized controlled trials of diuretic therapy comparing one diuretic with placebo, or one diuretic with another active agent (e.g. ACE inhibitors, digoxin) in patients with chronic heart failure.<br><i>Included patients:</i> Adults with chronic heart failure (NYHA Class II-IV).<br><i>Age distribution:</i> 59 years (mean).<br><i>Trial follow-up duration:</i> 23 weeks (average).<br><i>Blinding:</i> All trials had double blinding.                                                                                                                                                                                                                                                                          |
| ARBs      | Heran BS, Musini VM, Bassett K, Taylor RS, Wright JM. Angiotensin receptor blockers for heart failure. <i>Cochrane Database of Systematic Reviews</i> 2012, Issue 4. Art. No.: CD003040. | Number of included trials: 19<br><u>Comparison of ARBs vs. control</u><br>Pairwise effect estimate (95% CI): 0.94 (0.80, 1.10)<br>$I^2$ : 23.2%<br><u>Comparison of ARBs vs. ACE inhibitors</u><br>Pairwise effect estimate (95% CI): 0.86 (0.53, 1.40)<br>$I^2$ : 38.9% | <i>Eligibility criteria:</i> Double blind randomized controlled trials in men and women of all ages who have symptomatic heart failure and left ventricular systolic dysfunction or preserved ejection fraction.<br><i>Included patients:</i> Patients with class NYHA II-IV.<br><i>Age distribution:</i> Mean age was 64 for the comparison of ARBs vs. control; and 70 for the comparison of ARBs vs. ACE inhibitors.<br><i>Trial follow-up duration:</i> Average follow-up duration was 67 weeks for the comparison of ARBs vs. control; and 56 weeks for the comparison of ARBs and ACE inhibitors.<br><i>Blinding:</i> 8 out of 11 trials comparing ARBs vs. control had double blinding. 6 out of 8 trials comparing ARBs vs. ACE inhibitors had double blinding. |

**Pre-diabetes**

| Intervention | Publication                                                                                                                                                                                                                  | Pairwise meta-analysis                                                                                                                                                                                                                                                                                                                                                                                                                                                                                                                                                                                                                                                                                                                                                                                                                                                                                                                                                                                                                                                                                                                                                                 | Trial and patient population characteristics                                                                                                                                                                                                                                                                                                                                                                                                                              |
|--------------|------------------------------------------------------------------------------------------------------------------------------------------------------------------------------------------------------------------------------|----------------------------------------------------------------------------------------------------------------------------------------------------------------------------------------------------------------------------------------------------------------------------------------------------------------------------------------------------------------------------------------------------------------------------------------------------------------------------------------------------------------------------------------------------------------------------------------------------------------------------------------------------------------------------------------------------------------------------------------------------------------------------------------------------------------------------------------------------------------------------------------------------------------------------------------------------------------------------------------------------------------------------------------------------------------------------------------------------------------------------------------------------------------------------------------|---------------------------------------------------------------------------------------------------------------------------------------------------------------------------------------------------------------------------------------------------------------------------------------------------------------------------------------------------------------------------------------------------------------------------------------------------------------------------|
| Pre-diabetes | Hopper I, Billah B, Skiba M, Krum H. Prevention of diabetes and reduction in major cardiovascular events in studies of subjects with prediabetes: meta-analysis of RCTs. Eur J Cardiovasc Prev & Rehabil.2010;18(6) 813–823. | <p>Number of included trials: 10</p> <p><u>Comparison of exercise vs. control</u></p> <p>Pairwise effect estimate (95% CI): 0.77 (0.52, 1.14)</p> <p>I<sup>2</sup>: 0.0%</p> <p><u>Comparison of AGIs vs. control</u></p> <p>Pairwise effect estimate (95% CI): 1.99 (0.36, 10.87)</p> <p>I<sup>2</sup>: 0.0%</p> <p><u>Comparison of thiazolidinediones vs. control</u></p> <p>Pairwise effect estimate (95% CI): 5.02 (0.24, 105.31)</p> <p>I<sup>2</sup>: 0.0%</p> <p><u>Comparison of biguanides vs. control</u></p> <p>Pairwise effect estimate (95% CI): 0.28 (0.05, 1.70)</p> <p>I<sup>2</sup>: 0.0%</p> <p><u>Comparison of ACE inhibitors vs. control</u></p> <p>Pairwise effect estimate (95% CI): 0.91 (0.78, 1.06)</p> <p>I<sup>2</sup>: 0.0%</p> <p><u>Comparison of glides vs. control</u></p> <p>Pairwise effect estimate (95% CI): 1.00 (0.85, 1.17)</p> <p>I<sup>2</sup>: 0.0%</p> <p><u>Comparison of biguanides vs. exercise</u></p> <p>Pairwise effect estimate (95% CI): 0.42 (0.06, 2.89)</p> <p>I<sup>2</sup>: 0.0%</p> <p><u>Comparison of AGIs vs. exercise</u></p> <p>Pairwise effect estimate (95% CI): 13.33 (0.75, 236.92)</p> <p>I<sup>2</sup>: 0.0%</p> | <p><i>Eligibility criteria:</i> Randomized controlled trials reporting mortality benefits of pharmacological or non-pharmacological interventions in pre-diabetes.</p> <p><i>Included patients:</i> Patients with impaired glucose tolerance and impaired fasting glucose.</p> <p><i>Age distribution:</i> 52 years (mean) with a range from 45 to 64 years.</p> <p><i>Trial follow-up duration:</i> Range from 2.8 to 6 years.</p> <p><i>Blinding:</i> Not reported.</p> |

# Statistical evaluation of inconsistency between direct and indirect evidence

## 1. Stroke

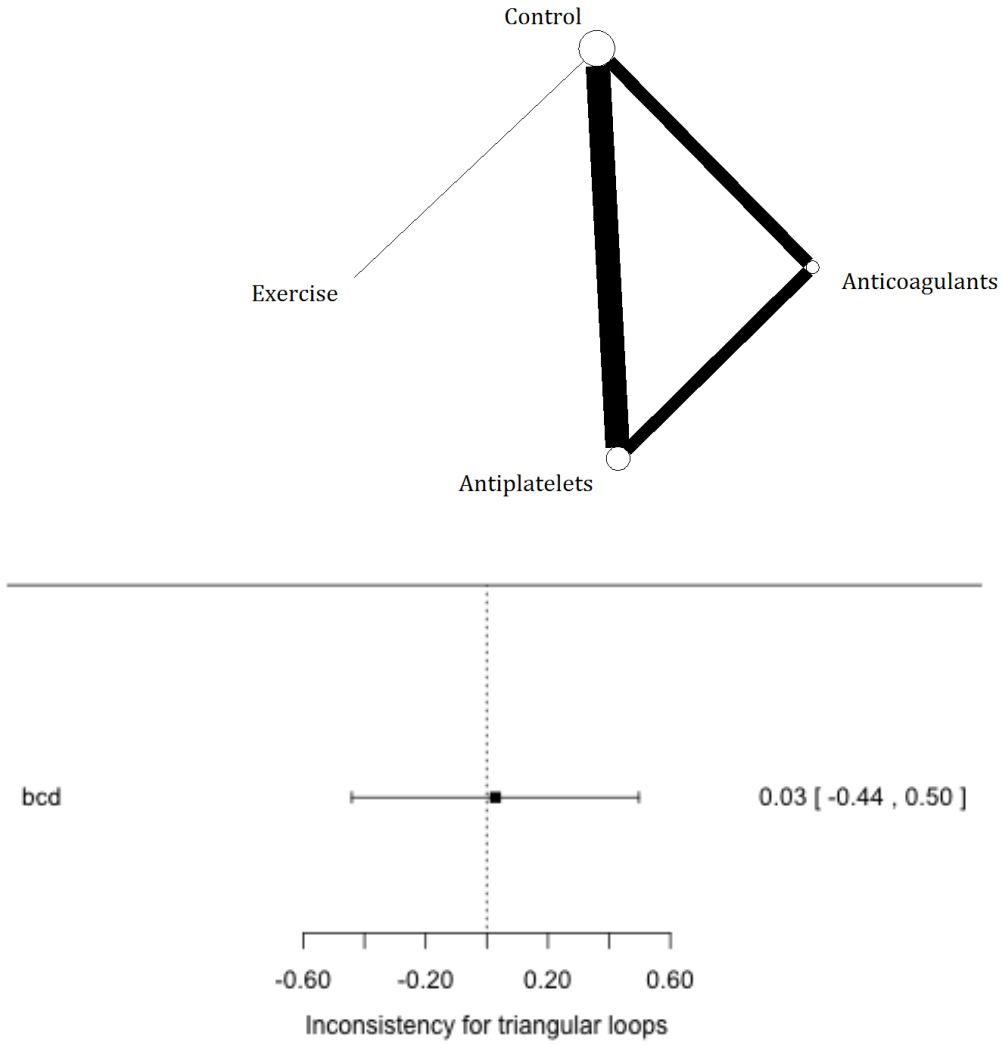

a: exercise; b: anticoagulants; c: antiplatelets; d: control



## 2. Heart Failure

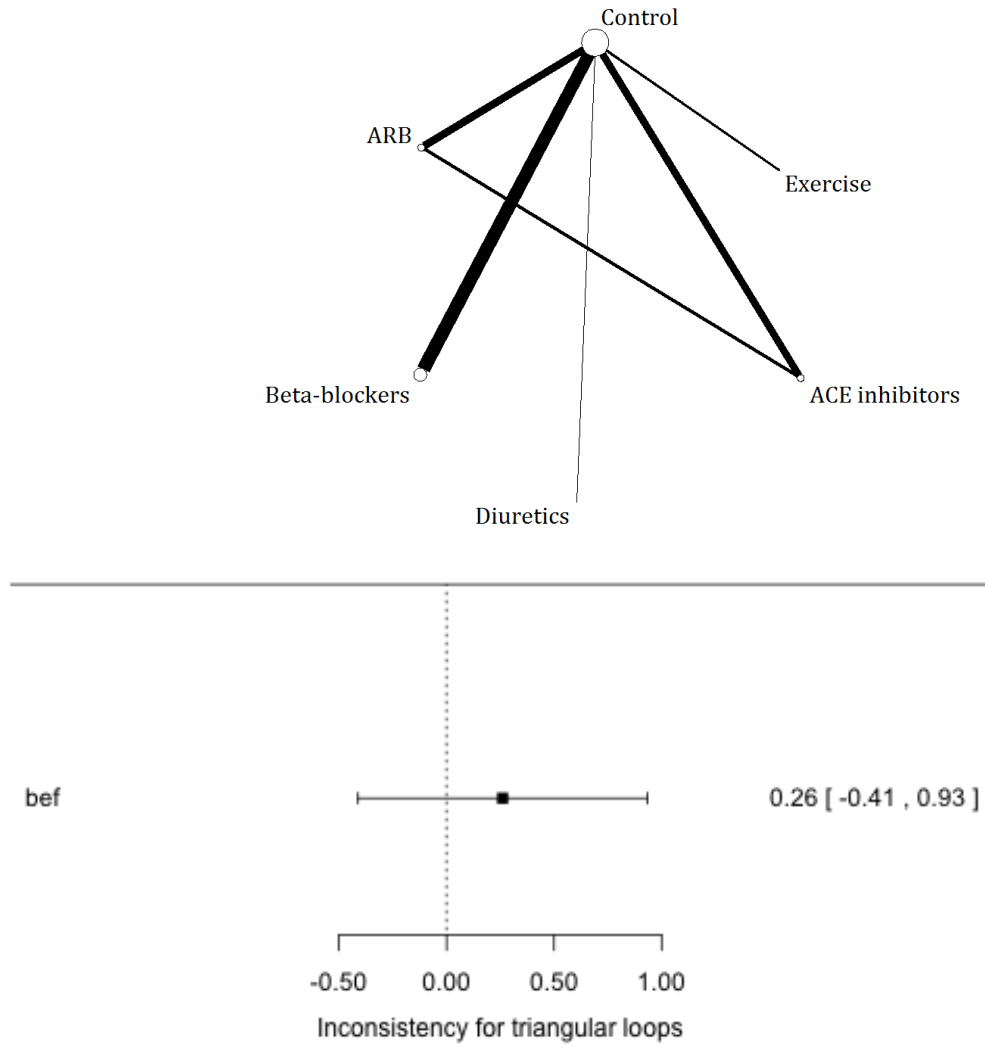

a: exercise; b: ACE inhibitors; c: diuretics; d: beta-blockers; e: ARBs; f: control

### 3. Pre-diabetes

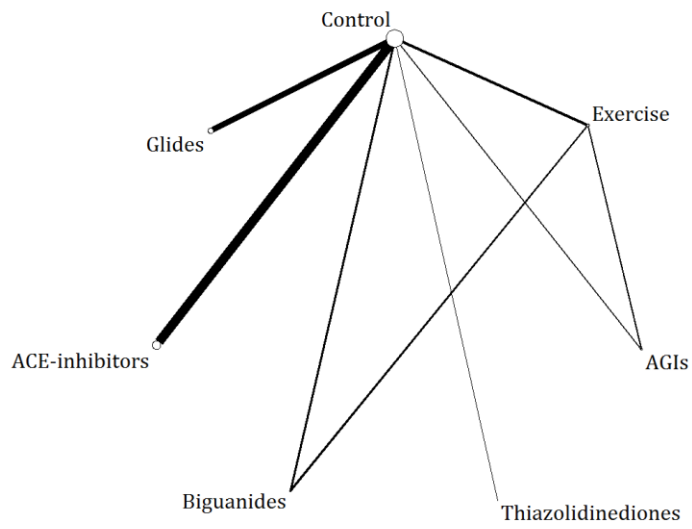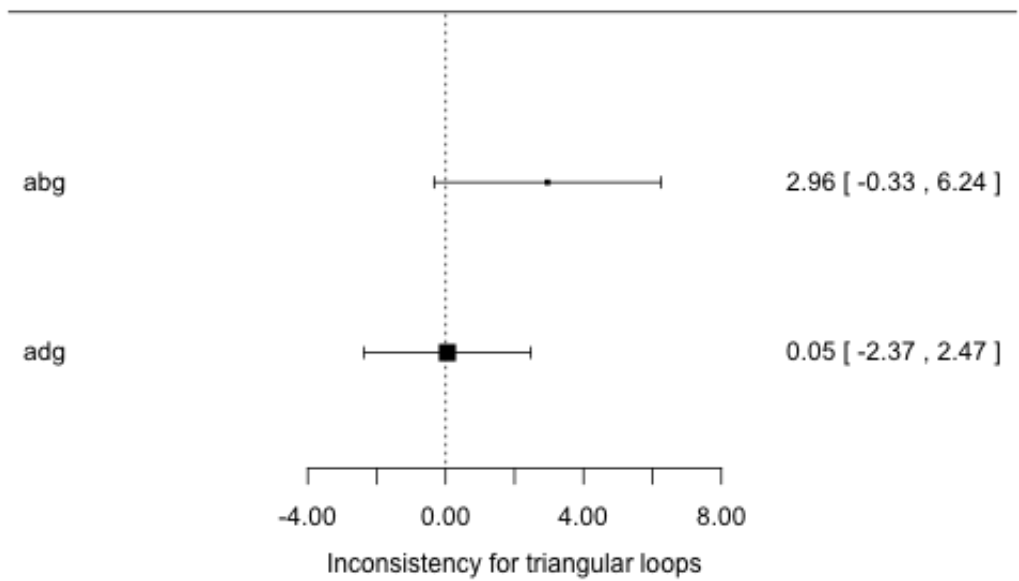

a: exercise; b: AGIs; c: thiazolididiones; d: biguanides; e: ACE inhibitors; f: glides; g: control

4. Pre-diabetes (sensitivity analysis)

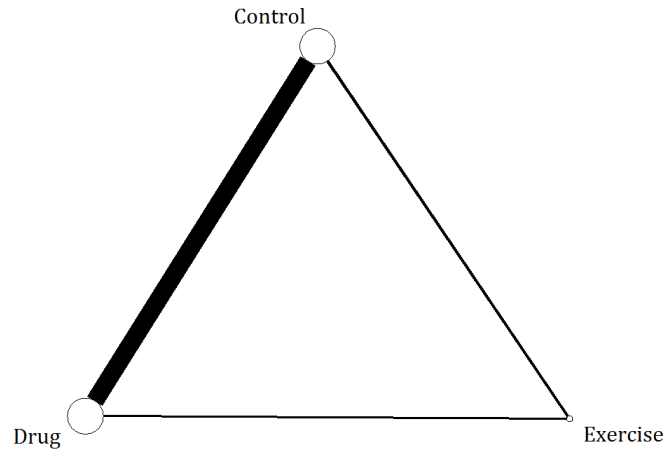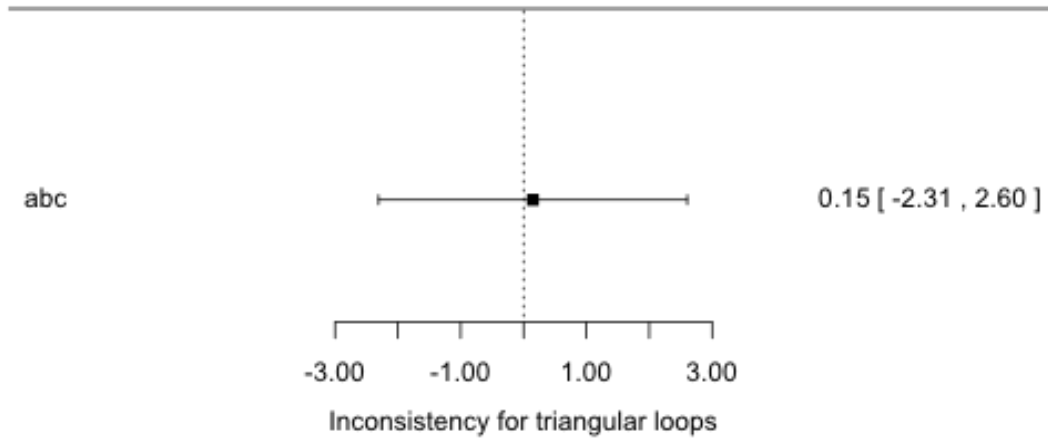

a: exercise; b: drug; c: control
